# Supplementary material
Source: PubMed Central journal article supplement (PMC3533498)
Supplement: NIHMS197807-supplement-SupplTable1.pdf [file NIHMS197807-supplement-SupplTable1.pdf]

Supplementary table 1

| Species               | Strain               | Locality           | COX1     | 84J03    | 1201     | ATP-F    | CK1      | FAA      | Opsin    | Pgi      | PKA      | SuTr     |
|-----------------------|----------------------|--------------------|----------|----------|----------|----------|----------|----------|----------|----------|----------|----------|
| <i>N. longicornis</i> | NL_IV7               | Utah (US)          | EU746524 | FJ158511 | FJ158160 | FJ158212 | GQ336328 | FJ158263 | FJ158317 | GQ336404 | FJ158461 | FJ158369 |
|                       | NL_CA9304            | California (US)    | FJ158441 | FJ158512 | FJ158161 | FJ158213 | GQ336329 | FJ158264 | FJ158318 | GQ336405 | FJ158462 | FJ158370 |
|                       | NL_CA003270          | California (US)    | EU746520 | FJ158513 | FJ158162 | FJ158214 | GQ336330 | FJ158265 | FJ158319 | GQ336406 | FJ158463 | FJ158371 |
|                       | NL_IDB418A           | Idaho (US)         | EU746522 | FJ158514 | FJ158163 | FJ158215 | GQ336331 | FJ158266 | FJ158320 | GQ336407 | FJ158464 | GQ336458 |
|                       | NL_MN8510            | Minnesota (US)     | EU746525 | FJ158515 | FJ158164 | FJ158216 | GQ336332 | FJ158267 | GQ336392 | GQ336408 | FJ158465 | FJ158372 |
|                       | NL_MT013             | Montana (US)       | EU746526 | FJ158516 | FJ158165 | FJ158217 | GQ336333 | FJ158268 | FJ158322 | GQ336409 | FJ158466 | FJ158373 |
|                       | NL_NV202H            | Idaho (US)         | EU746527 | FJ158517 | FJ158166 | FJ158218 | GQ336334 | FJ158269 | FJ158323 | GQ336410 | FJ158467 | GQ336455 |
|                       | NL_STCA              | California (US)    | GQ336369 | FJ158518 | FJ158167 | FJ158219 | GQ336335 | FJ158270 | FJ158324 | GQ336411 | FJ158468 | FJ158375 |
|                       | NL_UT230A            | Utah (US)          | EU746530 | GQ336301 | FJ158168 | FJ158220 | GQ336336 | FJ158271 | FJ158325 | GQ336411 | FJ158469 | FJ158380 |
|                       | NL_PE18Bx5           | Utah (US)          | EU746529 | FJ158519 | FJ158169 | FJ158221 | GQ336337 | FJ158272 | FJ158326 | GQ336412 | FJ158470 | FJ158376 |
|                       | NL_PE18BX4           | Utah (US)          | EU746528 | FJ158520 | FJ158170 | FJ158222 | GQ336338 | FJ158273 | FJ158327 | GQ336413 | FJ158471 | FJ158377 |
|                       | NL_BTPE18Bx5         | Utah (US)          | EU746519 | FJ158521 | FJ158171 | FJ158223 | GQ336339 | FJ158274 | FJ158328 | GQ336414 | FJ158472 | FJ158378 |
|                       | NL_DWR16_25          | Utah (US)          | EU746521 | FJ158522 | FJ158172 | FJ158224 | GQ336340 | FJ158275 | FJ158329 | GQ336415 | FJ158473 | FJ158379 |
|                       | NL_IT218X2           | New York (US)      | EU746523 | FJ158523 | FJ158173 | FJ158225 | GQ336341 | FJ158276 | GQ336392 | GQ336416 | FJ158474 | FJ158381 |
|                       | NL_BCOK              | British Columbia   | GQ336370 | GQ336302 | GQ336310 | GQ336320 | GQ336342 | GQ336385 | GQ336393 | GQ336417 | GQ336445 | GQ336457 |
|                       | NL_BCWL              | British Columbia   | GQ336371 | GQ336303 | GQ336311 | GQ336321 | GQ336343 | GQ336386 | GQ336394 | GQ336418 | GQ336444 | GQ336456 |
|                       | NG_RV2X              | Virginia (US)      | EU746515 | FJ158524 | FJ158174 | FJ158226 | GQ336344 | FJ158277 | FJ158330 | GQ336419 | FJ158475 | FJ158382 |
|                       | NG_OH206D            | Ohio(US)           | EU746511 | FJ158536 | GQ336312 | FJ158239 | GQ336357 | FJ158290 | FJ158343 | GQ336432 | FJ158485 | FJ158386 |
|                       | NG_PA0203            | Pennsylvania (US)  | EU746512 | FJ158525 | FJ158175 | FJ158227 | GQ336345 | FJ158278 | GQ336395 | GQ336420 | FJ158476 | FJ158383 |
|                       | NG_VA201R            | Virginia(US)       | EU746516 | FJ158526 | FJ158176 | FJ158228 | GQ336346 | FJ158279 | FJ158332 | GQ336421 | GQ336446 | FJ158384 |
|                       | NG_PA233F            | Pennsylvania (US)  | EU746514 | FJ158527 | FJ158177 | FJ158229 | GQ336347 | FJ158280 | GQ336396 | GQ336422 | GQ336447 | FJ158385 |
|                       | NG_VA5               | Virginia (US)      | EU746517 | FJ158528 | FJ158178 | FJ158230 | GQ336348 | FJ158281 | FJ158334 | GQ336423 | GQ336448 | FJ158387 |
|                       | NG_NY6J              | New York (US)      | EU746508 | FJ158529 | FJ158179 | FJ158231 | GQ336349 | FJ158282 | FJ158335 | GQ336424 | FJ158477 | FJ158388 |
|                       | NG_VA7               | Virginia (US)      | GQ336372 | FJ158530 | FJ158180 | FJ158232 | GQ336350 | FJ158283 | FJ158336 | GQ336425 | FJ158478 | FJ158389 |
|                       | NG_VA7B              | Virginia(US)       | GQ336372 | GQ336304 | FJ158181 | FJ158233 | GQ336351 | FJ158284 | FJ158337 | GQ336426 | FJ158479 | FJ158390 |
|                       | NG_NY6A5             | New York (US)      | GQ336373 | FJ158531 | FJ158182 | FJ158234 | GQ336352 | FJ158285 | FJ158338 | GQ336427 | FJ158480 | FJ158391 |
|                       | NG_VA6               | New York (US)      | GQ336374 | FJ158532 | FJ158183 | FJ158235 | GQ336353 | FJ158286 | FJ158339 | GQ336428 | FJ158481 | FJ158392 |
|                       | NG_NY6B              | New York (US)      | GQ336375 | FJ158533 | FJ158184 | FJ158236 | GQ336354 | FJ158287 | GQ336397 | GQ336429 | FJ158482 | FJ158393 |
|                       | NG_NY6X              | New York (US)      | GQ336376 | FJ158534 | GQ336313 | FJ158237 | GQ336355 | FJ158288 | FJ158341 | GQ336430 | FJ158483 | FJ158394 |
|                       | NG_NY7B              | New York (US)      | GQ336377 | FJ158535 | FJ158185 | FJ158238 | GQ336356 | FJ158289 | FJ158342 | GQ336431 | GQ336449 | FJ158395 |
|                       | NO_NY11_03           | Brewerton NY (USA) | EU746509 | FJ158537 | FJ158187 | FJ158240 | GQ336358 | FJ158291 | FJ158344 | GQ336433 | FJ158486 | FJ158396 |
|                       | NO_NY11_36           | Brewerton NY (USA) | EU746510 | FJ158538 | FJ158188 | FJ158241 | GQ336359 | FJ158292 | FJ158345 | GQ336434 | FJ158487 | FJ158397 |
| NO_NY11_32            | Brewerton NY (USA)   | GQ336378           | FJ158539 | FJ158189 | FJ158242 | GQ336360 | FJ158293 | FJ158346 | GQ336435 | FJ158488 | FJ158398 |          |
| NO_NY11_x1            | Brewerton NY (USA)   | GQ336378           | FJ158540 | FJ158190 | FJ158243 | GQ336361 | FJ158294 | FJ158347 | GQ336436 | FJ158489 | FJ158399 |          |
| NO_NYBR6A             | Brewerton NY (USA)   | GQ336380           | GQ336305 | GQ336315 | GQ336322 | GQ336364 | GQ336387 | GQ336398 | GQ336437 | GQ336450 | GQ336460 |          |
| NO_NYBR6B             | Brewerton NY (USA)   | GQ336381           | GQ336306 | GQ336316 | GQ336323 | GQ336365 | GQ336388 | GQ336399 | GQ336438 | GQ336451 | GQ336459 |          |
| NO_NYBR6C             | Brewerton NY (USA)   | GQ336382           | GQ336307 | GQ336317 | GQ336324 | GQ336366 | GQ336389 | GQ336400 | GQ336439 | GQ336452 | GQ336461 |          |
| NO_NY11_45            | Brewerton NY (USA)   | GQ336379           | FJ158542 | FJ158191 | FJ158244 | GQ336362 | FJ158295 | FJ158348 | GQ336440 | FJ158491 | FJ158400 |          |
| NO_NY26_20            | Brewerton NY (USA)   | EU746507           | FJ158541 | GQ336314 | FJ158245 | GQ336363 | FJ158296 | FJ158349 | GQ336441 | FJ158490 | FJ158401 |          |
| NO_NYSP1A             | Springville NY (USA) | GQ336383           | GQ336308 | GQ336318 | GQ336325 | GQ336367 | GQ336390 | GQ336401 | GQ336442 | GQ336453 | GQ336462 |          |

|                       |           |                      |          |          |          |          |          |          |          |          |          |          |
|-----------------------|-----------|----------------------|----------|----------|----------|----------|----------|----------|----------|----------|----------|----------|
| <i>N. oneida</i>      | NO_NYSP1C | Springville NY (USA) | GQ336384 | GQ336309 | GQ336319 | GQ336326 | GQ336368 | GQ336391 | GQ336402 | GQ336443 | GQ336454 | GQ336463 |
|                       | AsymCX    | Leiden (Netherlands) | EU746534 |          |          |          |          |          |          |          |          |          |
| <i>N. vitripennis</i> | NV_R511   | New York (USA)       | EU746548 | FJ158496 | FJ158144 | FJ158196 | GQ336327 | FJ158247 | FJ158301 | GQ336403 | FJ158445 | FJ158354 |
